# Supplementary material for: SETD5 haploinsufficiency affects mitochondrial compartment in neural cells
Source: Mol Autism. 2023 Jun 1;14:20. doi: 10.1186/s13229-023-00550-9 (PMC10233863; doi:10.1186/s13229-023-00550-9)
Supplement: Supplementary file 3 — Additional file 3: Table S3. List of primers and antibodies used in this work. [file 13229_2023_550_MOESM3_ESM.xlsx]

## Sheet: list of primers 
Gene	q-PCR Primers	Sequence
	18S_F	5'-GGTGAAATTCTTGGACCGGC-3'
rRNA 18s	18S_R	5'-GACTTTGGTTTCCCGGAAGC-3'
	Mfn1_F	5'-ATGGCAGAAACGGTATCTCCA-3'
Mfn1	Mfn1_R	5'-CTCGGATGCTATTCGATCAAGTT-3'
	Ppargc1a_F	5'-TATGGAGTGACATAGAGTGTGCT-3'
Paprgc1a	Ppargc1a_R	5'-CCACTTCAATCCACCCAGAAAAG-3'
	Polg_F	5'-GCAGGACAGTTAGTGGTGGG-3'
Polg	Polg_R	5'-GCTCATAGTATCGAGAAAACGCA-3'
	Opa1_F	5´-aagtccatgcgccattggga-3´
Opa1	Opa_R	5´-cgcccgacctgctcgccaca-3´

## Sheet: List of antibodies
Antibody type	Dilution	Host	Producer
Total OXPHOS cocktail	1:700	mouse	Abcam (ab110413)
Mfn1	1:500	mouse	Abcam (ab126575)
Opa1	1:1000	mouse	Abcam (ab42364)
Ndufs4	1:1000	mouse	Abcam (ab87399)
Tomm20	1:1000	rabbit	Novus(NBP1-81556)
Setd5	1:200	rabbit	St John’s Laboratory (STJ29443)
Beta-Actin	1:3000	mouse	Sigma -Aldrich (A228)
anti-mouse HRP	1:10000	Goat	Dako (P047)
anti-rabbit HRP	1:10000	Goat	Dako (P049)
anti- rabbit IgG 547	1:2000	Goat	Thermo Fisher (A11070)
